# Supplementary material for: Molecular understanding of the impacts of structural characteristics on ethanol adsorption performance for adsorption heat pumps
Source: Royal Society of Chemistry journal article supplement (doi:10.1039/d2me00222a), 2023-01-01
Supplement: d2me00222a1.pdf [file d2me00222a1.pdf]

## Supplementary Information

### Molecular understanding of the impacts of structural characteristics on ethanol adsorption performance for adsorption heat pumps

Wei Li<sup>a</sup>, Zhilu Liu<sup>b</sup>, Weixiong Wu<sup>a</sup>, Song Li<sup>b,\*</sup>

<sup>a</sup> Energy & Electricity Research Center, Jinan University, Zhuhai, 519070, China

<sup>b</sup> Department of New Energy Science and Engineering, School of Energy and Power Engineering, Huazhong University of Science and Technology, Wuhan 430074, China

Supplementary Information (SI) includes:

**Table S1.** The tunable parameters of pseudo material in this work.

**Table S2.** TraPPE force field parameters of ethanol.

**Table S3.** The uptake and uptake change ( $dW=W_{i+1}-W_i$ ) of structure with  $\sigma = 1 \text{ \AA}$ ,  $\epsilon = 0.252, 0.336, 2.52$ , and  $3.36 \text{ kJ/mol}$ , which the maximum  $dW(W_\alpha)$  were highlighted in green.

**Figure S1.** (a) The adsorption isotherm of structures with  $\sigma = 1 \text{ \AA}$ ,  $\epsilon = 0.252, 0.336 \text{ kJ/mol}$ , the step location was colored in red. (b) The adsorption isotherm of structures with  $\sigma = 1 \text{ \AA}$ ,  $\epsilon = 0.252, 0.336, 2.52, 3.36 \text{ kJ/mol}$ , the step location was colored in red.

**Figure S2.** The saturation capacity ( $W_s$ ) changed with  $\sigma$  and  $\epsilon$  in (a)  $l = 12.5$ , (b)  $l = 15$ , (c)  $l = 17.5$ , (d)  $l = 20$ , (e)  $l = 22.5$ , (f)  $l = 25$ , (g)  $l = 27.5$ , (h)  $l = 30$  and (i)  $l = 32.5 \text{ \AA}$  structure.

**Figure S3.** The step location ( $\alpha$ ) changed with  $\sigma$  and  $\epsilon$  in (a)  $l = 12.5$ , (b)  $l = 15$ , (c)  $l = 17.5$ , (d)  $l = 20$ , (e)  $l = 22.5$ , (f)  $l = 25$ , (g)  $l = 27.5$ , (h)  $l = 30$  and (i)  $l = 32.5 \text{ \AA}$  structure.

**Table S4.** The ratio of maximum  $W_\alpha$  compared to  $W_s$  for a fixed cell length.

**Figure S4.** The uptake change at step location ( $W_\alpha$ ) changed with  $\sigma$  and  $\epsilon$  in (a)  $l = 12.5$ , (b)  $l = 15$ , (c)  $l = 17.5$ , (d)  $l = 20$ , (e)  $l = 22.5$ , (f)  $l = 25$ , (g)  $l = 27.5$ , (h)  $l = 30$  and (i)  $l = 32.5 \text{ \AA}$  structure.

**Figure S5.** The step location ( $\alpha$ ) changed with  $\sigma$  and  $\epsilon$  in (a)  $l = 5$ , (b)  $l = 7.5$ , (c)  $l = 10$  and (d)  $l = 35 \text{ \AA}$  structure, which step location with  $W_\alpha < 0.01 \text{ g/g}$  were colored by white.

**Figure S6.** The step location ( $\alpha$ ) changed with  $\sigma$  and  $\epsilon$  in (a)  $l = 12.5$ , (b)  $l = 15$ , (c)  $l = 17.5$ , (d)  $l = 20$ , (e)  $l = 22.5$ , (f)  $l = 25$ , (g)  $l = 27.5$ , (h)  $l = 30$  and (i)  $l = 32.5 \text{ \AA}$  structure, which step location with  $W_\alpha < 0.01 \text{ g/g}$  were colored by white.

**Table S5.** The percentage of  $W_\alpha > 0.1 \text{ g/g}$  structures for fixed  $l$ .

**Figure S7.** The host-adsorbate interaction ( $Q_{\text{host-ad}}$ ) changed with  $\sigma$  and  $\epsilon$  in (a)  $l = 12.5$ , (b)  $l = 15$ , (c)  $l = 17.5$ , (d)  $l = 20$ , (e)  $l = 22.5$ , (f)  $l = 25$ , (g)  $l = 27.5$ , (h)  $l = 30$  and (i)  $l = 32.5 \text{ \AA}$  structure.

**Figure S8.** The adsorbate-adsorbate interaction ( $Q_{\text{ad-ad}}$ ) of ethanol under various LJ parameter ( $\sigma$  and  $\epsilon$ ) in (a)  $l = 5$ , (b)  $l = 7.5$ , (c)  $l = 10$  and (d)  $l = 35 \text{ \AA}$  structure.

**Figure S9.** The adsorbate-adsorbate interaction ( $Q_{\text{ad-ad}}$ ) of ethanol under various LJ parameter ( $\sigma$  and  $\epsilon$ ) in (a)  $l = 12.5$ , (b)  $l = 15$ , (c)  $l = 17.5$ , (d)  $l = 20$ , (e)  $l = 22.5$ , (f)  $l = 25$ , (g)  $l = 27.5$ , (h)  $l = 30$  and (i)  $l = 32.5 \text{ \AA}$  structure.

Corresponding Author:

\*E-mail:

[songli@hust.edu.cn](mailto:songli@hust.edu.cn)

**Table S1.** The tunable parameters of pseudo material in this work.

| Parameter        | Cell length / (Å)                                                  | $\sigma$ (Å)             | $\epsilon$ (kJ/mol)  |
|------------------|--------------------------------------------------------------------|--------------------------|----------------------|
| Range            | 5-35                                                               | 1-6                      | 0.042-4.2            |
| Presetting value | 5, 7.5, 10, 12.5, 15,<br>17.5, 20, 22.5, 25,<br>27.5, 30, 32.5, 35 | 1.0, 1.2, 1.4, 1.6, 1.8, |                      |
|                  |                                                                    | 2.0, 2.2, 2.4, 2.6, 2.8, | 0.042, 0.084, 0.168, |
|                  |                                                                    | 3.0, 3.2, 3.4, 3.6, 3.8, | 0.252, 0.336, 0.42,  |
|                  |                                                                    | 4.0, 4.2, 4.4, 4.6, 4.8, | 0.84, 1.68, 2.52,    |
|                  |                                                                    | 5.0, 5.2, 5.4, 5.6, 5.8, | 3.36, 4.2            |
|                  |                                                                    | 6.0                      |                      |

**Table S2.** TraPPE force field parameters of ethanol.

| adsorbate | interaction site | $\sigma$ (Å) | $\epsilon/k_B$ (kJ/mol) | $q$ (e) |
|-----------|------------------|--------------|-------------------------|---------|
| ethanol   | CH <sub>3</sub>  | 3.75         | 0.819                   | 0       |
|           | CH <sub>2</sub>  | 3.95         | 0.3822                  | 0.265   |
|           | O                | 3.02         | 0.777                   | -0.7    |
|           | H                | 0            | 0                       | 0.435   |

**Table S3.** The uptake and uptake change ( $dW=W_{i+1}-W_i$ ) of structure with  $\sigma = 1 \text{ \AA}$ ,  $\epsilon = 0.252, 0.336, 2.52$ , and  $3.36 \text{ kJ/mol}$ , which the maximum  $dW(W_\alpha)$  were highlighted in green.

| $P/P_0$         |        | 0.1    | 0.2    | 0.3    | 0.4    | 0.5    | 0.6    | 0.7    | 0.8    | 0.9    | 1.0    |
|-----------------|--------|--------|--------|--------|--------|--------|--------|--------|--------|--------|--------|
| $\epsilon=0.25$ | W      |        |        |        |        |        |        |        |        |        |        |
|                 | (mg/g) | 0.0009 | 0.0025 | 0.0027 | 0.0042 | 0.0044 | 0.0064 | 0.0069 | 0.0076 | 0.0088 | 0.0105 |
| 2               | dW     |        |        |        |        |        |        |        |        |        |        |
|                 | (mg/g) | 0.0009 | 0.0016 | 0.0002 | 0.0015 | 0.0002 | 0.002  | 0.0005 | 0.0007 | 0.0012 | 0.0017 |
| $\epsilon=0.33$ | W      |        |        |        |        |        |        |        |        |        |        |
|                 | (mg/g) | 0.0015 | 0.0031 | 0.004  | 0.0058 | 0.0068 | 0.0088 | 0.009  | 0.0114 | 0.0122 | 0.0141 |
| 6               | dW     |        |        |        |        |        |        |        |        |        |        |
|                 | (mg/g) | 0.0015 | 0.0016 | 0.0009 | 0.0018 | 0.001  | 0.002  | 0.0002 | 0.0024 | 0.0008 | 0.0019 |
| $\epsilon=2.52$ | W      |        |        |        |        |        |        |        |        |        |        |
|                 | (mg/g) | 0.07   | 0.13   | 0.22   | 0.28   | 0.34   | 0.41   | 0.56   | 9.94   | 13.68  | 287.23 |
|                 | dW     |        |        |        |        |        |        |        |        |        |        |
|                 | (mg/g) | 0.07   | 0.06   | 0.09   | 0.06   | 0.06   | 0.07   | 0.15   | 9.38   | 3.74   | 277.29 |
| $\epsilon=3.36$ | W      |        |        |        |        |        |        |        |        |        |        |
|                 | (mg/g) | 0.39   | 1.58   | 287.83 | 287.74 | 287.94 | 288.14 | 288.16 | 288.17 | 288.16 | 288.2  |
|                 | dW     |        |        |        |        |        |        |        |        |        |        |
|                 | (mg/g) | 0.39   | 1.19   | 286.25 | -0.09  | 0.2    | 0.2    | 0.02   | 0.01   | -0.01  | 0.04   |

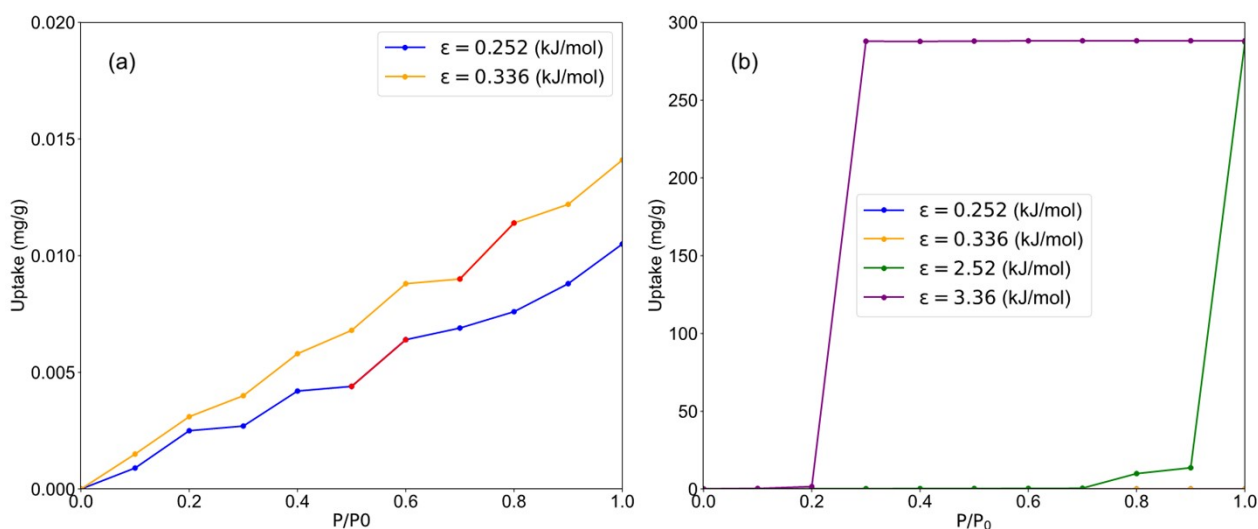

**Figure S1.** (a) The adsorption isotherm of structures with  $\sigma = 1 \text{ \AA}$ ,  $\epsilon = 0.252, 0.336 \text{ kJ/mol}$ , the step location was colored in red. (b) The adsorption isotherm of structures with  $\sigma = 1 \text{ \AA}$ ,  $\epsilon = 0.252, 0.336, 2.52, 3.36 \text{ kJ/mol}$ .

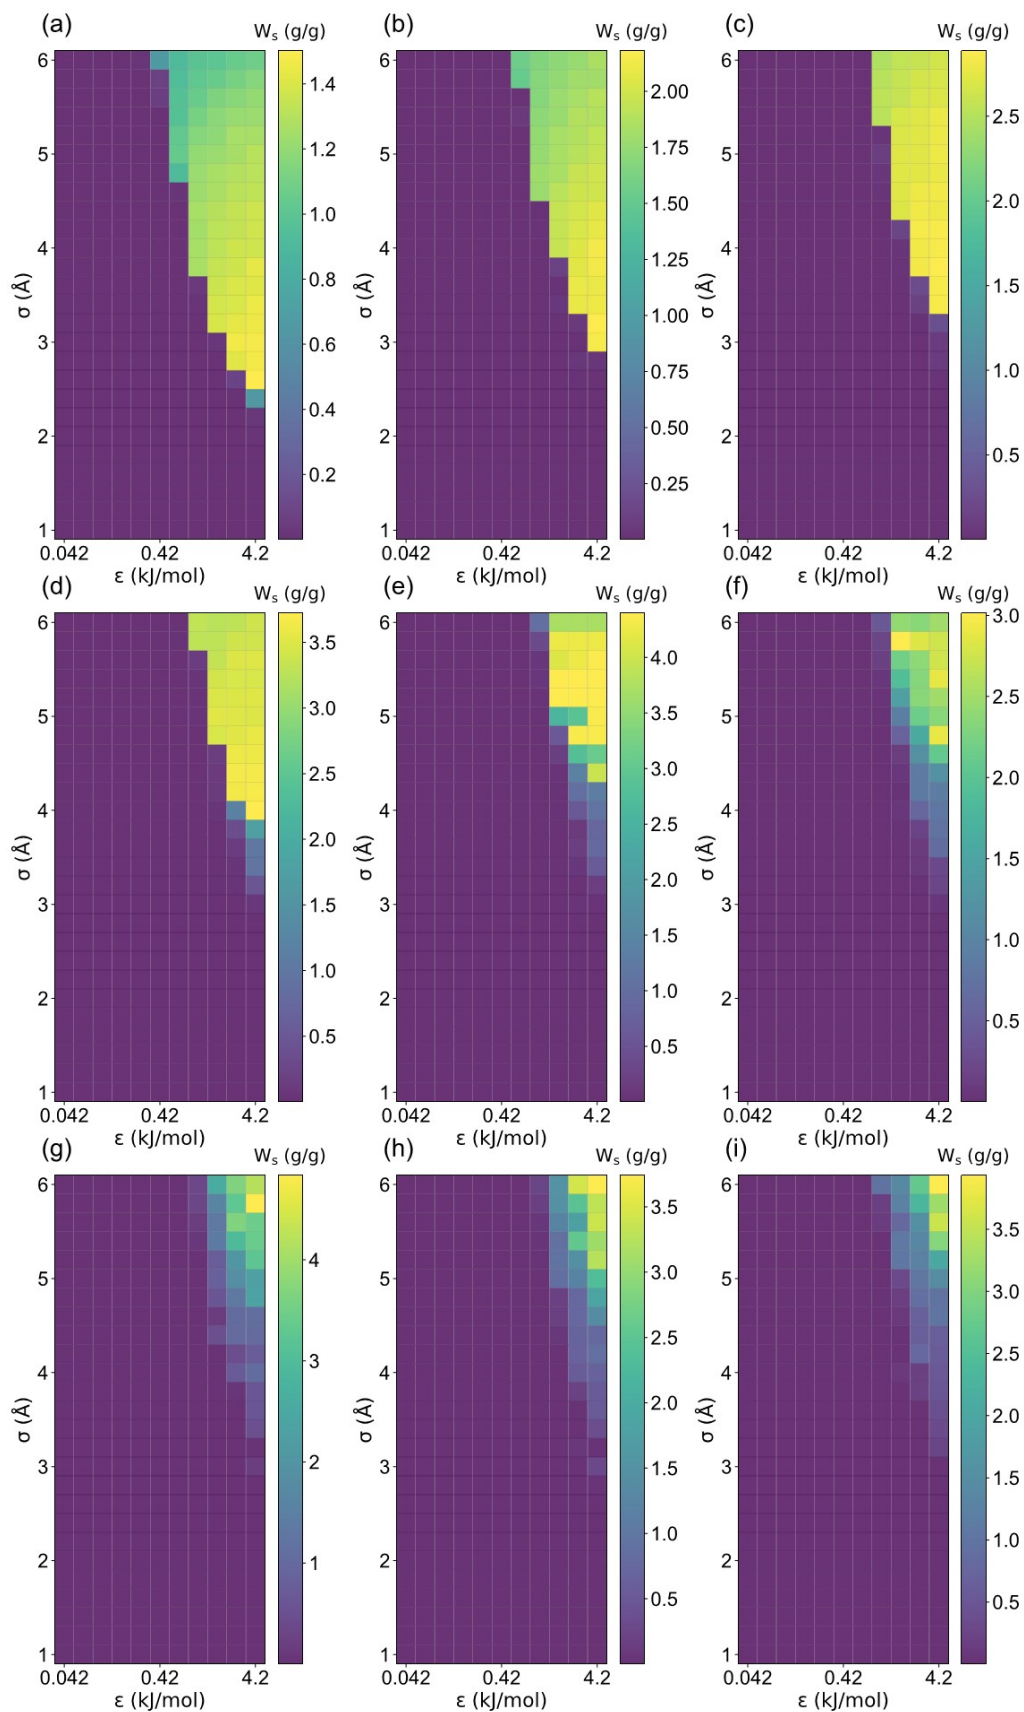

**Figure S2.** The saturation capacity ( $W_s$ ) changed with  $\sigma$  and  $\epsilon$  in (a)  $l = 12.5$ , (b)  $l = 15$ , (c)  $l = 17.5$ , (d)  $l = 20$ , (e)  $l = 22.5$ , (f)  $l = 25$ , (g)  $l = 27.5$ , (h)  $l = 30$  and (i)  $l = 32.5$  Å structure.

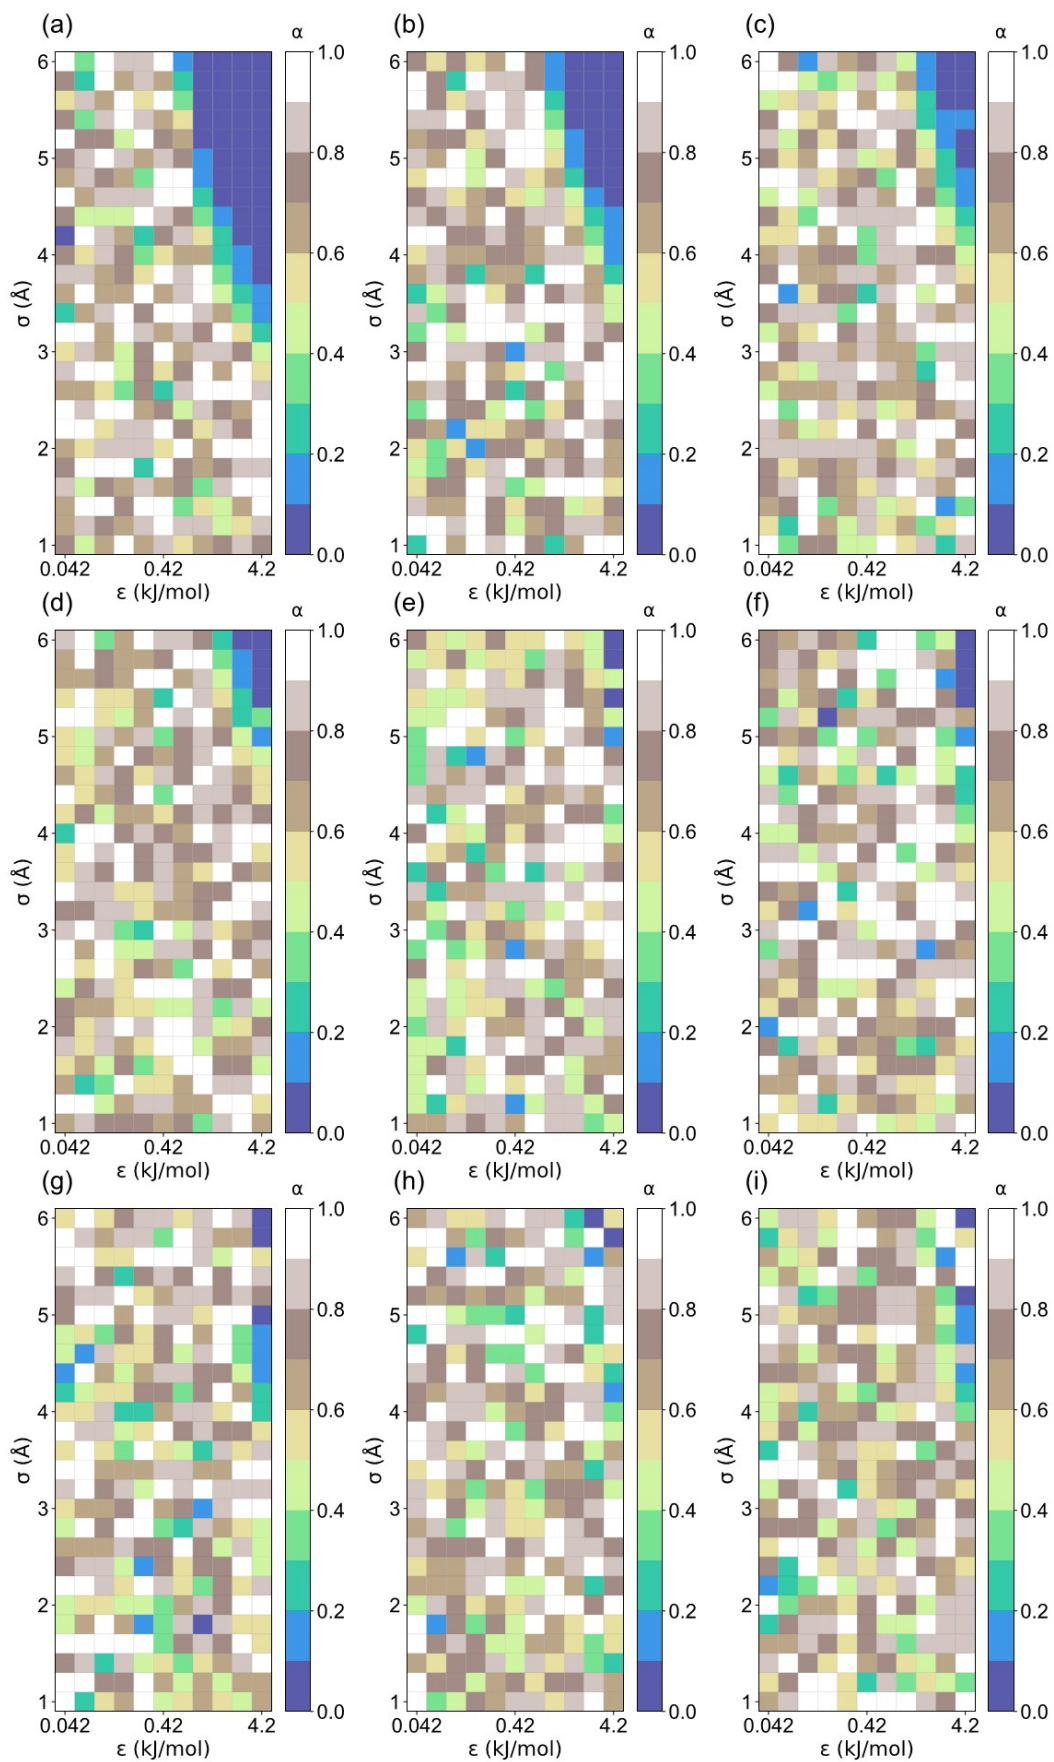

**Figure S3.** The step location ( $\alpha$ ) changed with  $\sigma$  and  $\epsilon$  in (a)  $l = 12.5$ , (b)  $l = 15$ , (c)  $l = 17.5$ , (d)  $l = 20$ , (e)  $l = 22.5$ , (f)  $l = 25$ , (g)  $l = 27.5$ , (h)  $l = 30$  and (i)  $l = 32.5$  Å structure.

**Table S4.** The ratio of maximum  $W_\alpha$  compared to  $W_s$  for a fixed cell length.

|                |        |       |        |        |        |        |      |
|----------------|--------|-------|--------|--------|--------|--------|------|
| $l$            | 5 Å    | 7.5 Å | 10 Å   | 12.5 Å | 15 Å   | 17.5 Å | 20 Å |
| $W_\alpha/W_s$ | 0.99   | 0.94  | 0.94   | 0.90   | 0.85   | 0.87   | 0.77 |
| $l$            | 22.5 Å | 25 Å  | 27.5 Å | 30 Å   | 32.5 Å | 35 Å   |      |
| $W_\alpha/W_s$ | 0.55   | 0.29  | 0.25   | 0.34   | 0.22   | 0.25   |      |

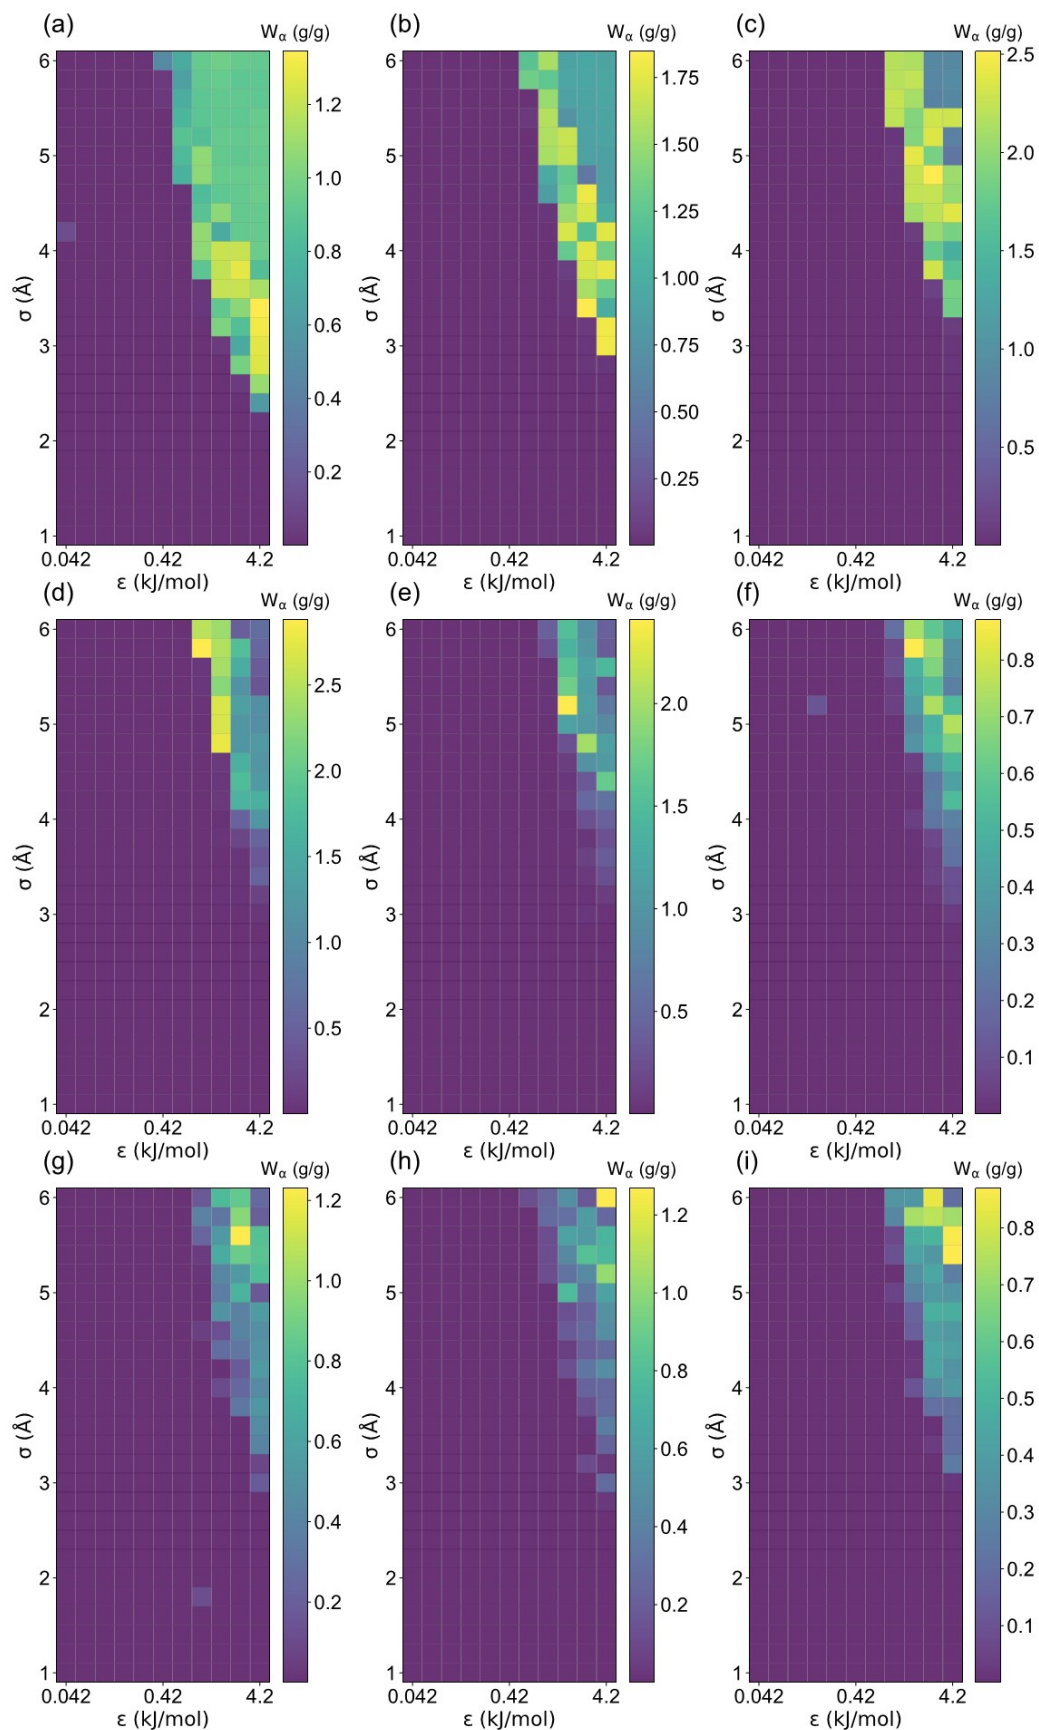

**Figure S4.** The uptake change at step location ( $W_\alpha$ ) changed with  $\sigma$  and  $\epsilon$  in (a)  $l = 12.5$ , (b)  $l = 15$ , (c)  $l = 17.5$ , (d)  $l = 20$ , (e)  $l = 22.5$ , (f)  $l = 25$ , (g)  $l = 27.5$ , (h)  $l = 30$  and (i)  $l = 32.5$  Å structure.



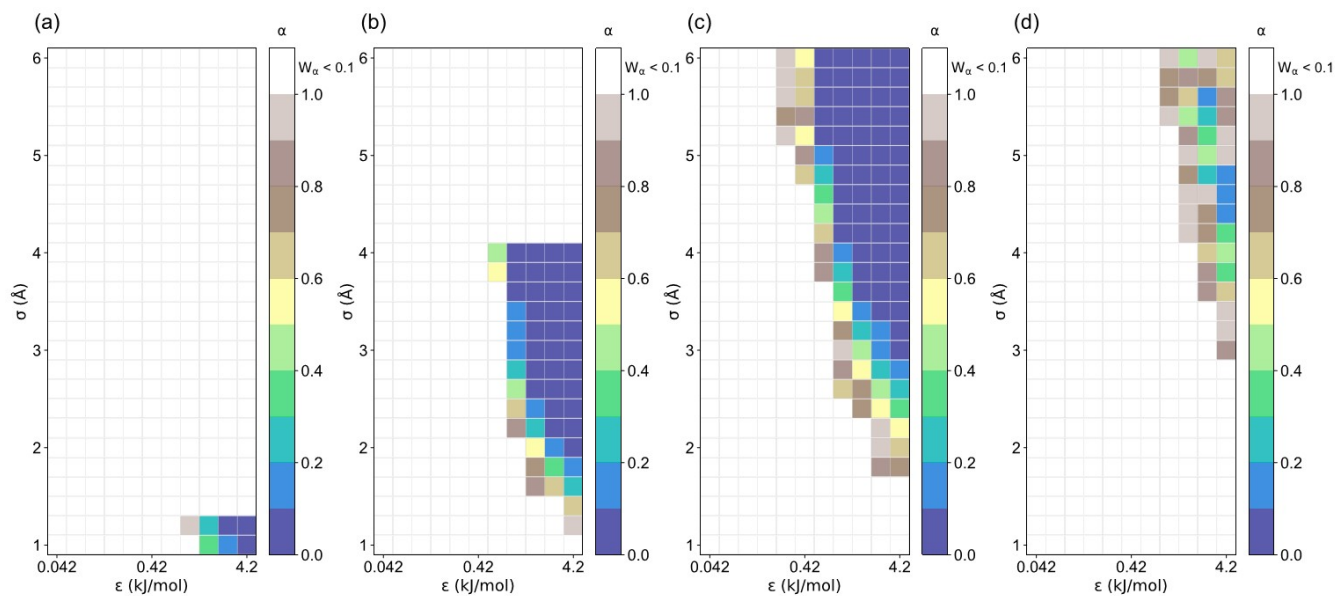

**Figure S5.** The step location ( $\alpha$ ) changed with  $\sigma$  and  $\epsilon$  in (a)  $l = 5$ , (b)  $l = 7.5$ , (c)  $l = 10$  and (d)  $l = 35$  Å structure, which step location with  $W_\alpha < 0.01$  g/g were colored by white.



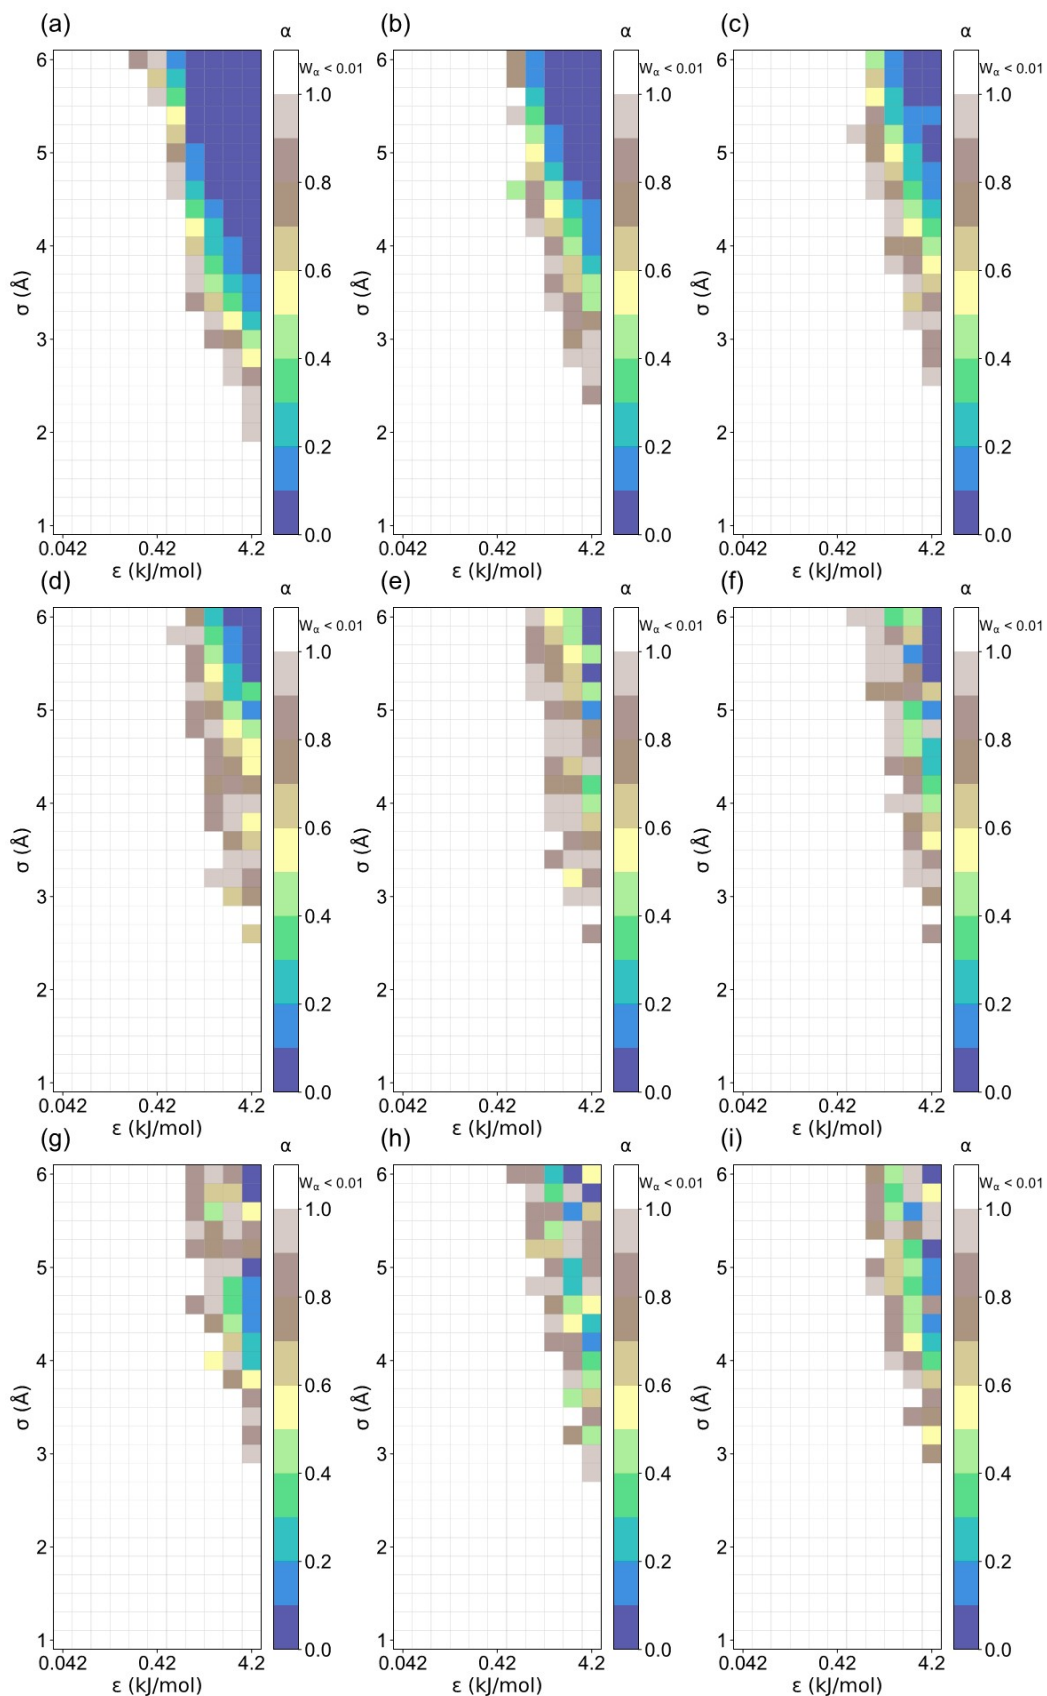

**Figure S6.** The step location ( $\alpha$ ) changed with  $\sigma$  and  $\epsilon$  in (a)  $l = 12.5$ , (b)  $l = 15$ , (c)  $l = 17.5$ , (d)  $l = 20$ , (e)  $l = 22.5$ , (f)  $l = 25$ , (g)  $l = 27.5$ , (h)  $l = 30$  and (i)  $l = 32.5$  Å structure, which step location with  $W_\alpha < 0.01$  g/g were colored by white.

**Table S5.** The percentage of  $W_\alpha > 0.1$  g/g structures for fixed  $l$ .

|       |        |       |        |        |        |        |       |
|-------|--------|-------|--------|--------|--------|--------|-------|
| $l$   | 5 Å    | 7.5 Å | 10 Å   | 12.5 Å | 15 Å   | 17.5 Å | 20 Å  |
| Ratio | 2.4%   | 18.5% | 36.7%  | 28.3%  | 22.4%  | 18.9%  | 18.9% |
| $l$   | 22.5 Å | 25 Å  | 27.5 Å | 30 Å   | 32.5 Å | 35 Å   |       |
| Ratio | 17.8%  | 16.8% | 15.4%  | 16.1%  | 0.22   | 15%    |       |

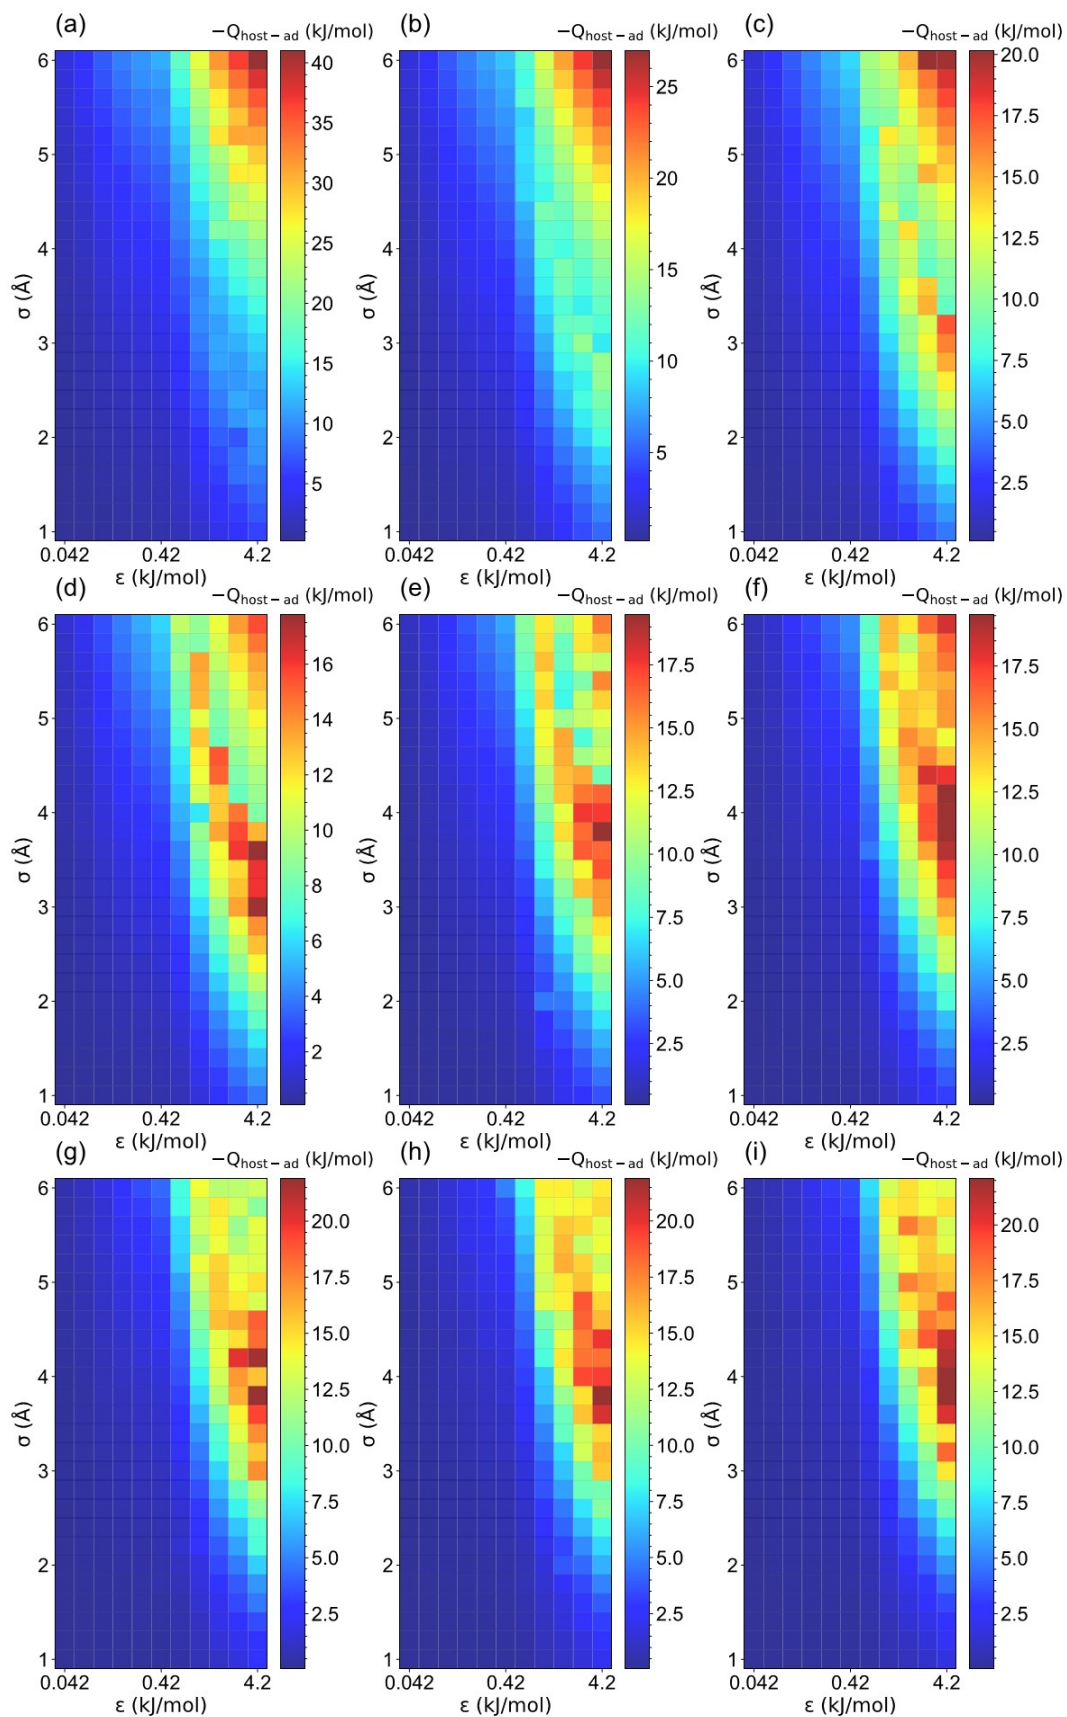

**Figure S7.** The host-adsorbate interaction ( $Q_{\text{host-ad}}$ ) changed with  $\sigma$  and  $\epsilon$  in (a)  $l = 12.5$ , (b)  $l = 15$ , (c)  $l = 17.5$ , (d)  $l = 20$ , (e)  $l = 22.5$ , (f)  $l = 25$ , (g)  $l = 27.5$ , (h)  $l = 30$  and (i)  $l = 32.5$  Å structure.

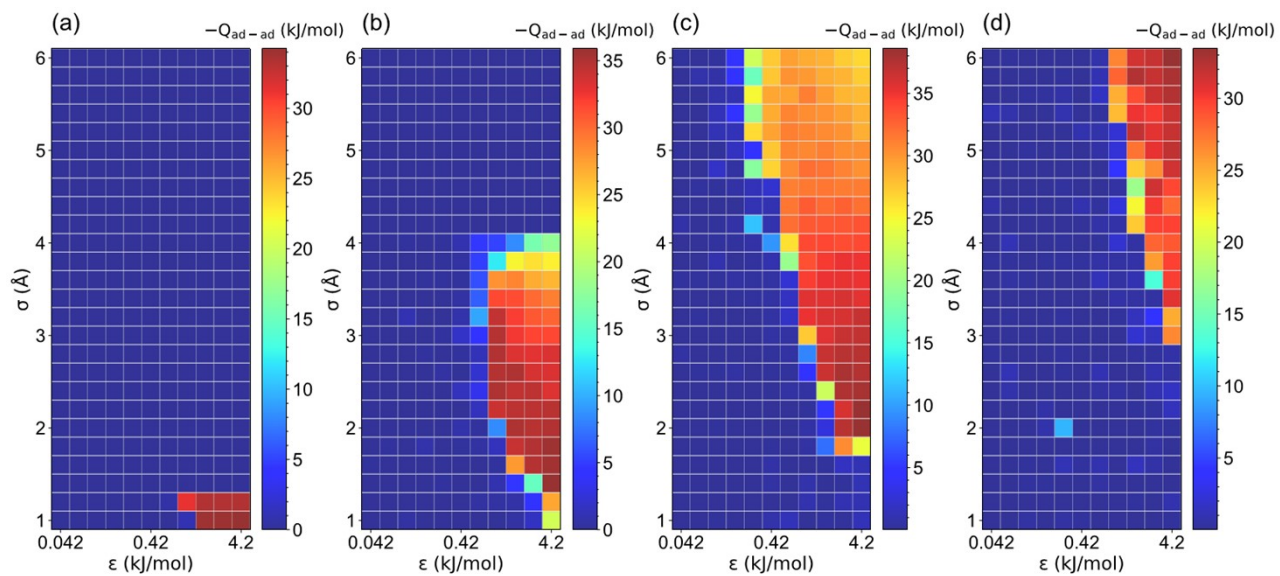

**Figure S8.** The adsorbate-adsorbate interaction ( $Q_{ad-ad}$ ) of ethanol under various LJ parameter ( $\sigma$  and  $\epsilon$ ) in (a)  $l = 5$ , (b)  $l = 7.5$ , (c)  $l = 10$  and (d)  $l = 35$  Å structure.

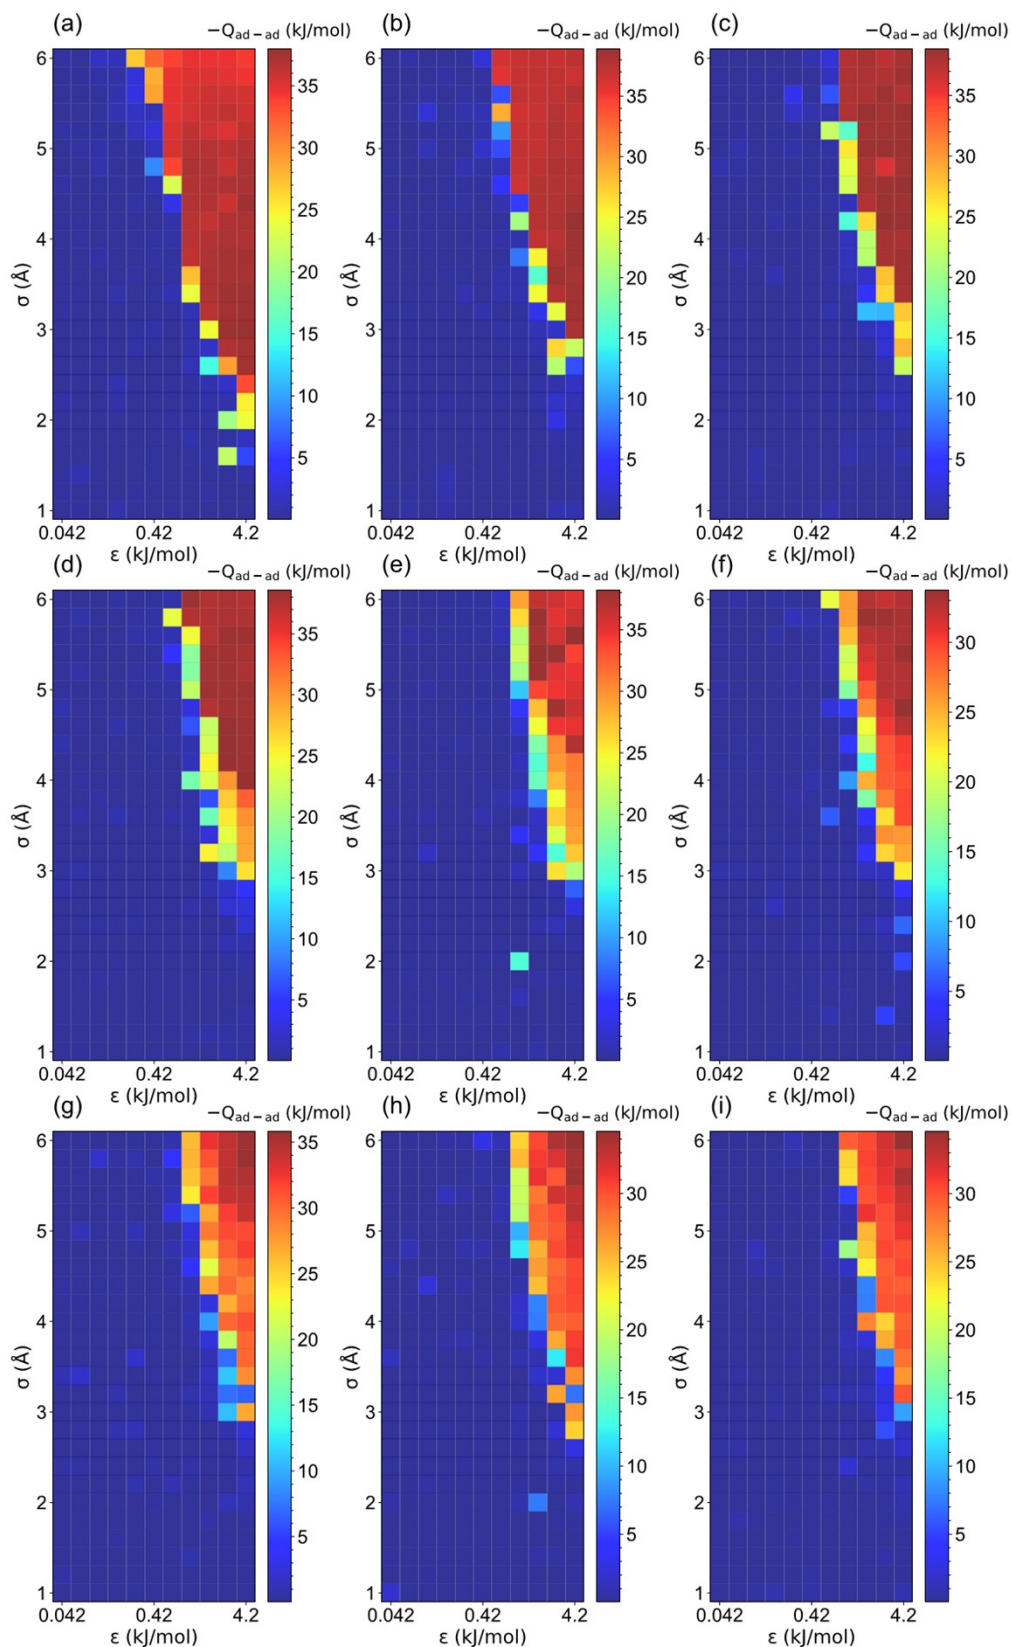

**Figure S9.** The adsorbate-adsorbate interaction ( $Q_{ad-ad}$ ) of ethanol under various LJ parameter ( $\sigma$  and  $\epsilon$ ) in (a)  $l = 12.5$ , (b)  $l = 15$ , (c)  $l = 17.5$ , (d)  $l = 20$ , (e)  $l = 22.5$ , (f)  $l = 25$ , (g)  $l = 27.5$ , (h)  $l = 30$  and (i)  $l = 32.5$  Å structure.
